# Supplementary material for: Microwave-assisted rapid synthesis of nitrogen-enriched amphibious carbon quantum dots for sensitive detection of ROS and multiple other applications
Source: Royal Society of Chemistry journal article supplement (doi:10.1039/d3tb00614j), 2023-01-01
Supplement: d3tb00614j1.pdf [file d3tb00614j1.pdf]

## Supplementary Material

### **Microwave-assisted rapid synthesis of N-enriched amphibious carbon quantum dots for sensitive detection of ROS and multiple other applications**

Ranjit De <sup>a,b</sup>, Kyung Won Jo <sup>a,c</sup>, Byoung Hun Lee <sup>d</sup>, Surajit Some <sup>e,\*</sup> and Kyong-Tai Kim <sup>f,\*</sup>

<sup>a</sup> *Department of Life Sciences, Pohang University of Science and Technology, Pohang 37673, South Korea*

<sup>b</sup> *Department of Materials Science and Engineering, Pohang University of Science and Technology, Pohang 37673, South Korea*

<sup>c</sup> *HESED BIO, Institute of Membrane Proteins, Pohang, Gyeongbuk 37563, Republic of Korea*

<sup>d</sup> *Department of Electrical Engineering, Center for Semiconductor Technology Convergence, Pohang University of Science and Technology, Pohang 37673, South Korea*

<sup>e</sup> *Department of Specialty Chemicals Technology, Institute of Chemical Technology, Mumbai 400019, India*

<sup>f</sup> *Generative Genomics Research Center, Global Green Research & Development Center, Handong Global University, Pohang, South Korea*

\*Corresponding author. E-mail: [ktk@postech.ac.kr](mailto:ktk@postech.ac.kr) (KTK), [ktk@handong.edu](mailto:ktk@handong.edu) (KTK); [sr.some@ictmumbai.edu.in](mailto:sr.some@ictmumbai.edu.in) (SS)

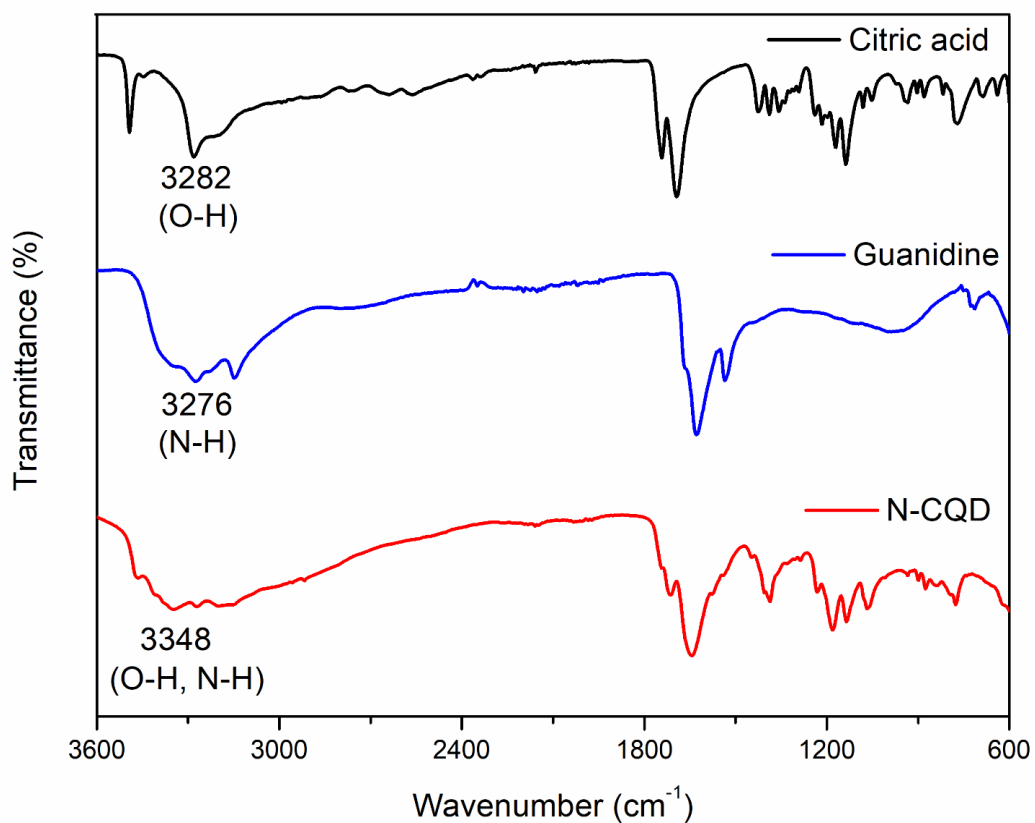

**Figure S1.** ATR-FTIR spectra of citric acid, guanidine nitrate, and synthesized nitrogen-doped carbon quantum dots (N-CQDs) highlighting the O-H and N-H bands in the wavenumber region from 3,500 to 3,300 cm<sup>-1</sup>.

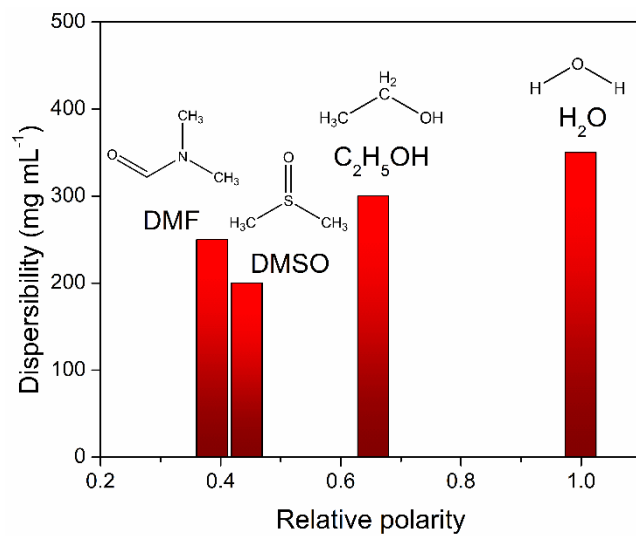

**Figure S2.** The dispersibility of nitrogen-doped carbon quantum dots in solvents with different solvent polarities. Abbreviation. DMSO: dimethyl sulfoxide.

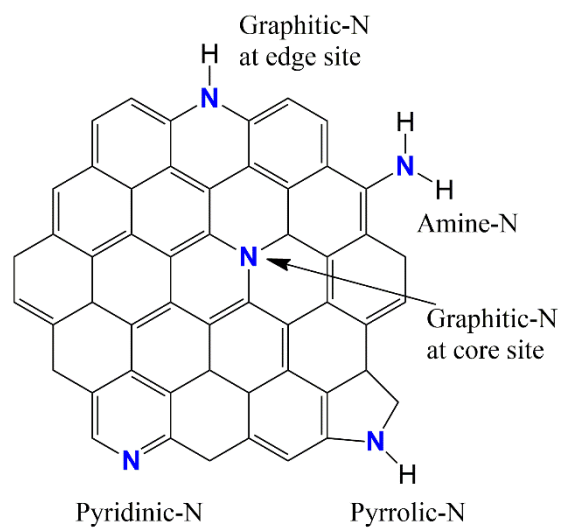

**Scheme S1.** A schematic presentation of the different types of nitrogen containing moieties in nitrogen-doped carbon quantum dots.

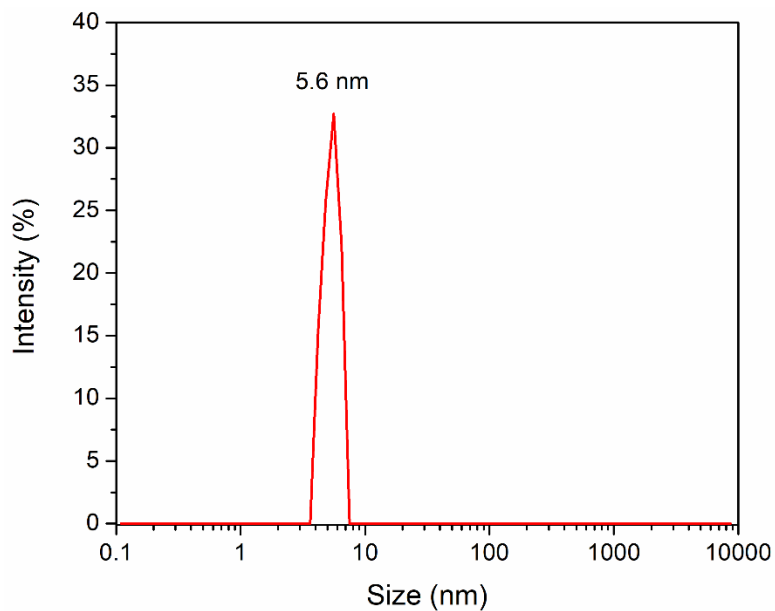

**Figure S3.** The size distribution of the synthesized N-CQDs measured in water was found to be within the range 3 to 8 nm which centered around 5.6 nm.

**Evaluation of the Interplane Distance by the following Bragg's Equation,**

$$d_{(hkl)} = \lambda / (2 \sin \theta),$$

Here,  $d$  = interplane spacing, and  $\lambda = 0.15406$  nm

$$\text{For, } 2\theta = 19.4, d_{(002)} = 0.15406 / (2 \sin (19.4/2)) = 0.46 \text{ nm}$$

$$\text{For, } 2\theta = 9, d_{(100)} = 0.15406 / (2 \sin (9/2)) = 0.98 \text{ nm}$$

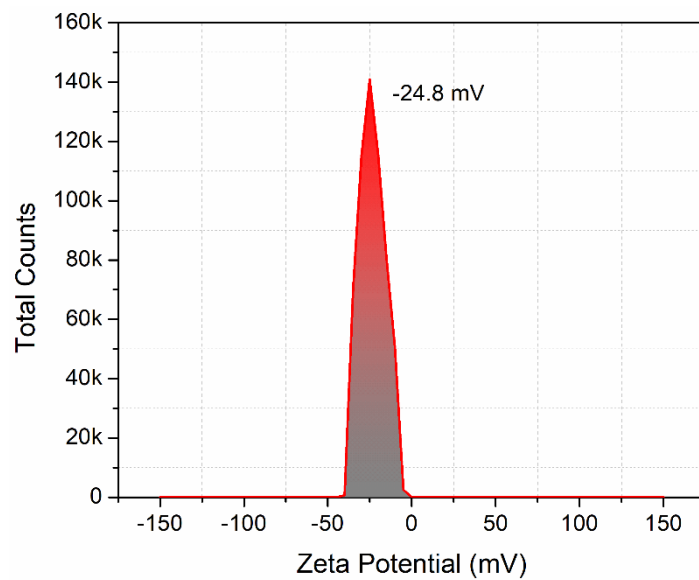

**Figure S4.** The surface charge of synthesized N-CQDs obtained by zeta-potential measurements in PBS buffer of pH 7.4.

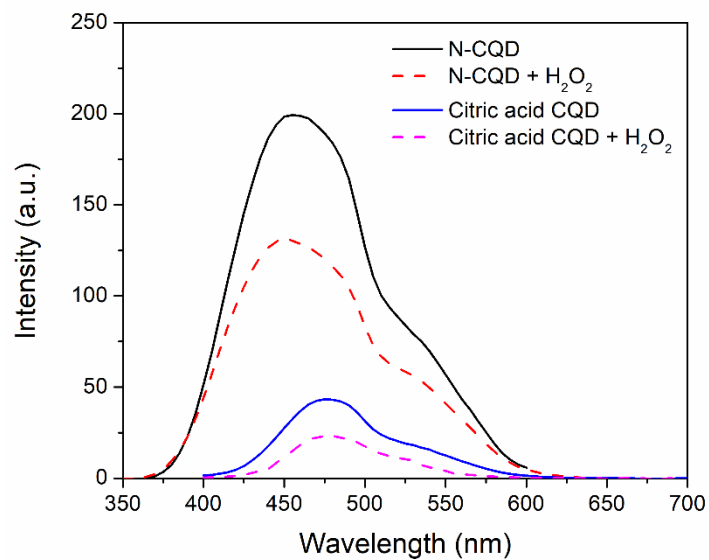

**Figure S5.** Fluorescence intensity of nitrogen-doped carbon quantum dot (N-CQD) is much higher than that of the carbon quantum dot prepared from citric acid (citric acid CQD). In addition, interaction of H<sub>2</sub>O<sub>2</sub> with N-CQD is much more efficient than that of citric acid CQD.



### Calculation of Quantum Yield

$$Q = Q_R \frac{I}{I_R} \frac{A_R}{A} \left( \frac{\eta}{\eta_R} \right)^2 = 0.31 \times \frac{60.3}{29.1} \times \frac{0.054}{0.089} \times \left( \frac{1.33}{1.33} \right)^2 = 0.39$$

**Table S1.** The different mass ratio of Citric Acid and Guanidine Nitrate and different reaction duration were investigated in this study.

| <b>Reaction Duration</b>                               | <b>10 min</b> | <b>7 min</b> | <b>5 min</b> | <b>3 min</b> | <b>2 min</b> |
|--------------------------------------------------------|---------------|--------------|--------------|--------------|--------------|
| <b>Mass Ratio of Citric Acid and Guanidine Nitrate</b> |               |              |              |              |              |
| <b>1 : 1</b>                                           | √             | √            | √            | √            | √            |
| <b>1 : 2</b>                                           | √             | √            | √            | √            | √            |
| <b>2 : 1</b>                                           | √             | √            | √            | √            | √            |

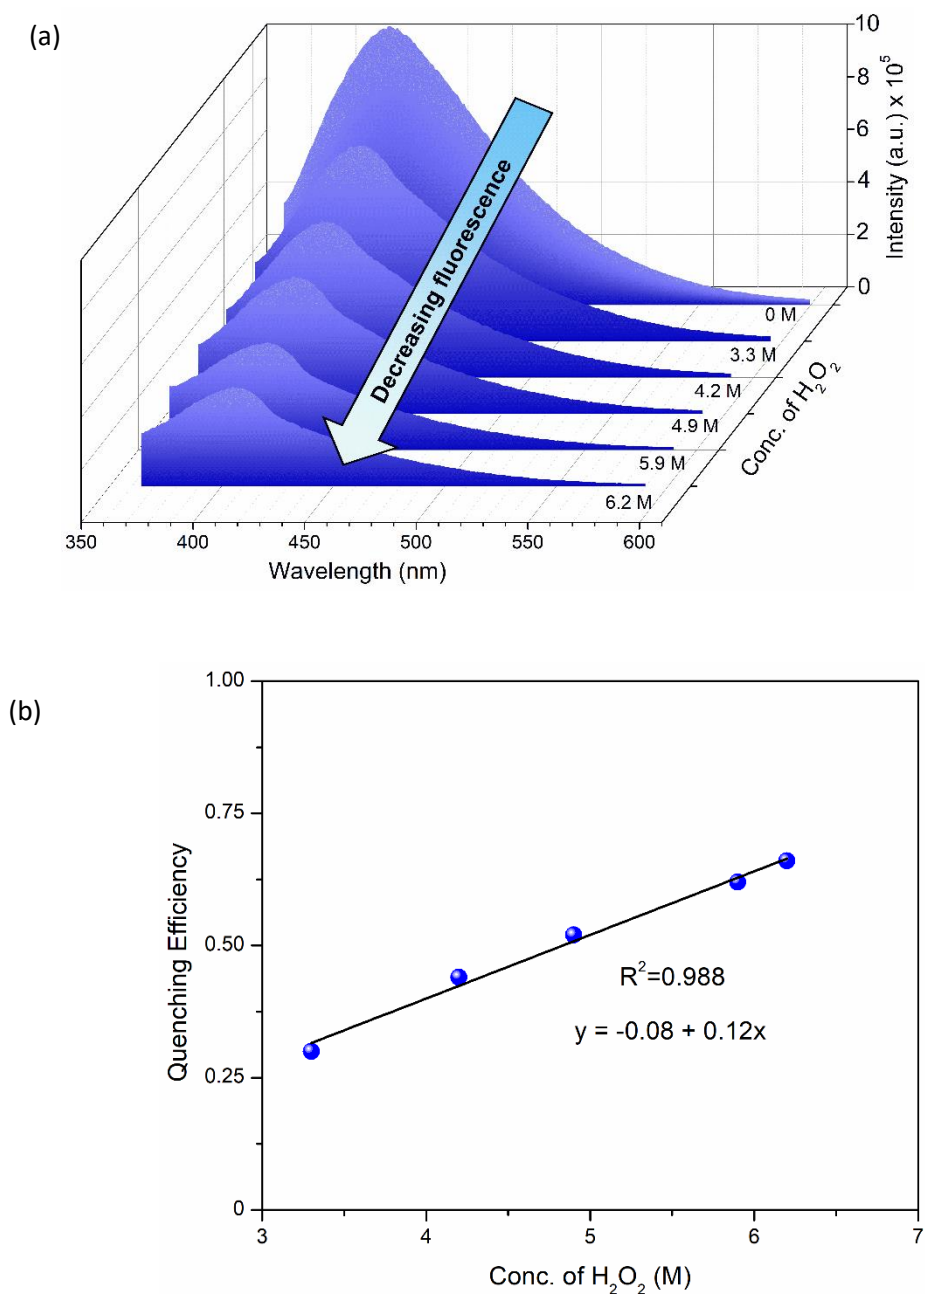

**Figure S6.** (a) Fluorescence response of synthesized N-CQDs (1 mg mL<sup>-1</sup>) at different concentrations of H<sub>2</sub>O<sub>2</sub>. (b) The fluorescence quenching efficiency at different concentrations of H<sub>2</sub>O<sub>2</sub> obeyed a straight-line equation. The quenching efficiency was calculated using the expression  $(I_0 - I)/I_0$ , where  $I$  = fluorescence intensity of N-CQDs in presence of H<sub>2</sub>O<sub>2</sub> and  $I_0$  = fluorescence intensity of N-CQDs in absence of H<sub>2</sub>O<sub>2</sub>.

**Table S2.** A comparison of the H<sub>2</sub>O<sub>2</sub> detection by the proposed method with similar other reported methods.

| Sl. No. | Synthesis method | Detection method  | Limit of detection | Linear range              | Ref.      |
|---------|------------------|-------------------|--------------------|---------------------------|-----------|
| 1       | Hydrothermal     | Colorimetry       | 6.5 $\mu$ M        | 315 $\mu$ M – 6.5 $\mu$ M | 1         |
| 2       | Hydrothermal     | Colorimetry       | 5.3 $\mu$ M        | 1170 $\mu$ M – 20 $\mu$ M | 2         |
| 3       | Solvothermal     | Fluorometry       | 8 $\mu$ M          | 1 mM – 100 $\mu$ M        | 3         |
| 4       | Solvothermal     | Chemiluminescence | 11.7 $\mu$ M       | 50 mM – 1 mM              | 4         |
| 5       | Solvothermal     | Fluorometry       | 14 mM              | 0.5 M – 50 mM             | 5         |
| 6       | Microwave        | Fluorometry       | 2.1 $\mu$ M        | 6.2 M – 50 $\mu$ M        | This work |

## References

- 1 P. Li, X. Y. Sun and J. S. Shen, *Front. Chem.*, 2021, **9**, 713104.
- 2 L. Lin, X. Song, Y. Chen, M. Rong, T. Zhao, Y. Wang, Y. Jiang and X. Chen, *Anal. Chim. Acta*, 2015, **869**, 89–95.
- 3 X. Shan, L. Chai, J. Ma, Z. Qian, J. Chen and H. Feng, *Analyst*, 2014, **139**, 2322–2325.
- 4 C. L. Shen, G. S. Zheng, M. Y. Wu, J. Y. Wei, Q. Lou, Y. L. Ye, Z. Y. Liu, J. H. Zang, L. Dong and C. X. Shan, *Nanophotonics*, 2020, **9**, 3597–3604.
- 5 C. L. Shen, L. X. Su, J. H. Zang, X. J. Li, Q. Lou and C. X. Shan, *Nanoscale Res. Lett.*, 2017, **12**, 447.
